# Bayesian hierarchical model for dose finding trial incorporating historical data

Linxi Han<sup>a</sup>, Qiqi Deng<sup>b,1</sup>, Zhangyi He<sup>c,2</sup>, Frank Fleischer<sup>d</sup>, Feng Yu<sup>\*,a</sup>

<sup>a</sup>*School of Mathematics, University of Bristol, Bristol, United Kingdom*

<sup>b</sup>*Biostatistics and Data Sciences, Boehringer Ingelheim Pharmaceuticals Inc., Ridgefield, Connecticut, USA*

<sup>c</sup>*Department of Epidemiology and Biostatistics, School of Public Health, Imperial College London, London, UK*

<sup>d</sup>*Biostatistics+Data Sciences Corp., Boehringer Ingelheim Pharma GmbH & Co. KG, Biberach, Germany*

---

## Abstract

The Multiple Comparison Procedure and Modelling (MCPMod) approach has been shown to be a powerful statistical tool that can significantly improve the design and analysis of dose finding studies under model uncertainty. Due to its frequentist nature, however, it is difficult to incorporate into MCPMod information from historical trials on the same drug. Recently, a Bayesian version of MCPMod has been introduced by Fleischer et al. (2022) to resolve this issue, which is particularly tailored to the situation where there is information about the placebo dose group from historical trials. In practice, information may also be available on active dose groups from early phase trials, e.g., a dose escalation trial and a preceding small Proof of Concept trial with only a placebo and a high dose. To address this issue, we introduce a Bayesian hierarchical framework capable of incorporating historical information about both placebo and active dose groups with the flexibility of modelling both prognostic and predictive between-trial heterogeneity. Our method is particularly useful in the situation where the effect sizes of two trials are different. Our goal is to reduce the necessary sample size in the dose finding trial while maintaining its target power.

---

\*Corresponding author.

*Email address:* [feng.yu@bristol.ac.uk](mailto:feng.yu@bristol.ac.uk) (Feng Yu)

<sup>1</sup>Present address: 200 Technology Square Cambridge, MA 02139, United States

<sup>2</sup>Present address: Cancer Research UK Beatson Institute, Glasgow G61 1BD, United Kingdom

**NOTE: This preprint reports new research that has not been certified by peer review and should not be used to guide clinical practice.**

*Key words:* Dose finding, Historical borrowing, Bayesian hierarchical framework,  
Between-trial heterogeneity

---

## 1. Introduction

A key component of successful pharmaceutical drug development is the accurate determination of an appropriate dose level in early phase clinical trials. The final selection of dose level in Phase II studies has a considerable impact on the success probability of confirmatory Phase III studies and consequently the entire drug development program. Owing to the limited amount of available data on the efficacy and safety of a specific compound and small sample sizes in early stages of clinical development, determining the right dose level is among the most challenging steps during drug development. As mentioned in Bretz et al. (2005), if the selected dose is too high, it can lead to safety problems as well as unacceptable adverse events in later studies, while a too-low dose leads to an increased likelihood that the drug fails to provide adequate clinical benefit, which impacts success probabilities of trials in later phases. Hence, when we evaluate the dose-response relationship, it is important to use a method capable of extracting the most information from available data. A method based on a statistical model that accurately reflects the clinical situation stands the best chance of yielding accurate estimates of the dose-response relationship.

Traditionally, dose-finding trials have been addressed through either a multiple comparison procedure (MCP) or a modelling (Mod) approach. Bretz et al. (2005) combined these two approaches to devise an improved method called Multiple Comparison Procedure and Modelling (MCPMod). The classic MCPMod assumes normally distributed data. Pinheiro et al. (2014) extended the approach to non-normal data. The main idea of MCPMod is to use a candidate set of parametric models to describe the unknown dose-response relationship, test these candidate models against a flat curve using MCP techniques and finally select a significant model to fit the data. This approach is reasonably robust against model misspecification since it allows the specification of multiple

26 candidate models that can hopefully cover all plausible dose-response relationships. It is  
27 also flexible in the estimation of the optimal dose, which is not restricted to the doses  
28 under investigation. European Medicines Agency (EMA) (2014) and USA Food and Drug  
29 Administration (FDA) (2016) qualified MCPMod as an adequate and efficient method  
30 for dose finding trials.

31 MCPMod is based on the frequentist methodology. As a result, it can be difficult for  
32 a new study to incorporate information from historical trials on the same drug. Neuenschwander et al. (2010) pointed out that information from historical trials can be im-  
33 portant to the design and analysis of a new trial. The incorporation of such historical  
34 information in the design and analysis of a new study can reduce the duration of the  
35 trial and/or the number of patients necessary to achieve the desired power, resulting in  
36 a reduction of overall cost (Schmidli et al., 2014). There has been increasing interest in  
37 incorporating such historical information into the design and analysis of clinical studies  
38 (Berry, 2006). Existing methods to incorporating historical information includes power  
39 priors (Ibrahim & Chen, 2000), meta-analytic analyses (Neuenschwander et al., 2010)  
40 and commensurate priors (Hobbs et al., 2012). When incorporating historical data, it is  
41 always desirable to design the framework in a way that is capable of modelling potential  
42 differences between historical and current data. In view of this, these approaches discount  
43 the information in the historical data to either a fixed degree or a degree determined dy-  
44 namically according to between-trial heterogeneity.

46 There has also been work that uses a Bayesian framework to include historical data  
47 in the design and analysis of new trials. Fleischer et al. (2022) proposed an approach,  
48 known as Bayesian MCPMod (BMCPMod), that focuses on the situation where such  
49 historical information is coming only from the placebo dose group. BMCPMod essentially  
50 reproduces the results of the classic MCPMod for non-informative priors but allows for  
51 the incorporation of historical data if available, leading to an improvement in design  
52 efficiency. However, in practice, historical information of active dose groups may also be  
53 available from early phase trials, e.g., a dose-escalation trial and a preceding small Proof

54 of Concept (PoC) trial with only a placebo and a high dose.

55 To address this problem, in this work we introduce a Bayesian hierarchical framework  
56 for the dose finding problem. It incorporates historical information from both placebo  
57 and active dose groups and accounts for both prognostic and predictive between-trial  
58 heterogeneity. One of the primary use cases of this model is for cases where the effect  
59 sizes of two trials are different. The goal is to reduce the necessary sample size in dose  
60 finding trials while maintaining its target power. The Bayesian hierarchical model we  
61 propose in this work performs the requisite analysis combining data from the two trials.  
62 This is referred to as the meta-analytic-combined approach by Schmidli et al. (2014).

63 The remainder of this paper is structured as follows. In Section 2, we introduce our  
64 Bayesian hierarchical model and review the Bayesian pooling model. In Section 3, we  
65 perform simulation studies to compare these two approaches in terms of precision, power  
66 and type I error. Finally, Section 4 provides a summary and discussion of results.

## 67 2. Methodology

### 68 2.1. Bayesian hierarchical model

69 We assume there are two trials, a current trial and a historical trial, with  $\mathbf{Y}^{(c)}$  and  
70  $\mathbf{Y}^{(h)}$  denoting the data from each trial, respectively. We also assume there are a total  
71 of  $K + 1$  unique dose groups  $\mathcal{D} = \{d_0, \dots, d_K\}$  in the two trials, including a placebo dose  
72  $d_0$ . Let  $I_c$  and  $I_h$  denote the indices of doses present in the current and historical trial,  
73 respectively. Let  $n_i^{(c)}$  and  $n_i^{(h)}$  denote the number of patients from the current and/or  
74 historical trial, respectively, who are given dose  $d_i$ . For example, if  $i \notin I_c$ , then  $n_i^{(c)} = 0$ .  
75 We assume the following statistical model for  $\mathbf{Y}^{(c)}$  and  $\mathbf{Y}^{(h)}$ :

$$\begin{aligned} Y_{ij}^{(c)} \mid \mu_i, r &\sim N(\mu_i + r, \sigma^2), i \in I_c, j = 1, \dots, n_i^{(c)} \\ Y_{ij}^{(h)} \mid \mu_i, a, r &\sim N(a \cdot \mu_i - r, \sigma^2), i \in I_h, j = 1, \dots, n_i^{(h)} \end{aligned} \quad (1)$$

76 where  $\mu_i = \mu(d_i)$  are the unknown mean effect of the treatment from the current trial  
77 at each dose level,  $\pm r$  denotes the deviation from the mean effect in each trial (as a

78 result of heterogeneity of prognostic effects), and  $a$  is a scalar to allow for heterogeneity  
79 in the predictive effects between the two trials. The mean effect  $\mu_i$  and the heterogeneity  
80 parameters  $r$  and  $a$  are assumed to be random. We will specify their prior distributions  
81 a bit later. We assume variance  $\sigma^2$  to be known and constant across all dose groups.  
82 The model can be easily extended to cases where the effect variance is not constant at  
83 different doses. Finally, we assume all  $Y_{ij}^{(c)}$  and  $Y_{ij}^{(h)}$  are conditionally independent given  
84  $\mu_i$ ,  $r$  and  $a$ .

85 For the mean effect  $\boldsymbol{\mu} = (\mu_0, \dots, \mu_K)$ , we use an improper non-informative uniform  
86 prior  $p(\mu_i) \equiv 1$  for all  $i$ . The heterogeneity of predictive effects (treatment effects) is  
87 represented by the fixed effect ratio  $a$  across different dose groups. The parameter  $a$  is  
88 assumed to be distributed as follows:

$$a \sim N(1, \eta^2) \text{ or } N_{[b, 1/b]}(1, \eta^2) \quad (2)$$

89 where  $N_{[b, 1/b]}$  denotes the normal distribution with variance  $\eta^2$  truncated to the interval  
90  $[b, 1/b]$  for some  $0 < b < 1$ . The heterogeneity of prognostic effects between the two trials  
91 is expressed by the random effect  $r$  with the following prior

$$r|\tau \sim N(0, \tau^2) \quad (3)$$

92 with between-trial standard deviation  $\tau$ . The parameter  $\tau$  controls the level of borrowing  
93 based on the similarity of prognostic effects between two trials. The prognostic effect  
94 under model (1) is  $2r + (1 - a)\mu_0$ , where  $\mu_0$  is the effect of the placebo dose.

95 We give some intuition about the choice of the hyperparameter  $\tau$ . If  $\tau$  is close to  
96 0, then the assumption is that the prognostic heterogeneity is small between studies,  
97 i.e. there is a small difference in response of the placebo arm between studies. On  
98 the other hand, if  $\tau$  is large, then the prognostic heterogeneity between the trials is  
99 high and the historical study data should have less relevance in the analysis of the data  
100 from the current trial. To account for the uncertainty about  $\tau$ , we will use the half-

101 normal prior distribution as its prior. This prior distribution should cover the range of  
 102 typical values representing plausible (e.g., from small to large) between-trial heterogeneity  
 103 (Spiegelhalter et al., 2004; Gelman, 2006; Röver et al., 2021). We will discuss the two types  
 104 of heterogeneities in Sections 2.4 and 2.5. Given an observed outcome  $\mathbf{Y} = (\mathbf{Y}^{(c)}, \mathbf{Y}^{(h)})$ ,  
 105 the resulting posterior probability distribution for  $\boldsymbol{\mu}$ ,  $a$ ,  $r$  and  $\tau$  can be written as:

$$\begin{aligned} \mathbb{P}(\boldsymbol{\mu}, a, r, \tau | \mathbf{Y}) &\propto \mathbb{P}(\mathbf{Y} | \boldsymbol{\mu}, a, r) \mathbb{P}(\boldsymbol{\mu}) \mathbb{P}(a) \mathbb{P}(r, \tau) \\ &= \mathbb{P}(\mathbf{Y}^{(c)} | \boldsymbol{\mu}, r) \mathbb{P}(\mathbf{Y}^{(h)} | a, \boldsymbol{\mu}, r) \prod_{i=1}^K \mathbb{P}(\mu_i) \mathbb{P}(a) \mathbb{P}(r | \tau) \mathbb{P}(\tau), \end{aligned} \quad (4)$$

106 where

$$\begin{aligned} \mathbb{P}(\mathbf{Y}^{(c)} | \boldsymbol{\mu}, r) &= \prod_i^{I_c} \prod_j^{n_i^{(c)}} \mathbb{P}(Y_{ij}^{(c)} | \mu_i, r) \\ \mathbb{P}(\mathbf{Y}^{(h)} | a, \boldsymbol{\mu}, r) &= \prod_i^{I_h} \prod_j^{n_i^{(h)}} \mathbb{P}(Y_{ij}^{(h)} | \mu_i, a, r). \end{aligned}$$

107 As the posterior probability distribution above is unavailable in a closed form, we  
 108 perform MCMC sampling using the Metropolis-Hastings algorithm to obtain posterior  
 109 samples of  $\boldsymbol{\mu}$ ,  $a$  and  $r$ . See Appendix A for details of this algorithm.

110 We recall that under the classic frequentist MCPMod, we would like to check for a  
 111 non-flat relationship for the set of candidate models  $\mathcal{M} = \{M_m, m = 1, \dots, M\}$ . We  
 112 will define a Bayesian version of this test that corresponds to the null and alternative  
 113 hypotheses, upon which we will assess type I error and power. Let  $\mathbf{c} = \{\mathbf{c}_1, \dots, \mathbf{c}_m\}$  be  
 114 the contrast vectors for the candidate models  $\mathcal{M}$  and  $\boldsymbol{\mu} = (\mu_1, \dots, \mu_K)$  be the unknown  
 115 mean effect vector of  $\mathcal{D}$ . For model  $m$  and its corresponding contrast vector  $\mathbf{c}_m$ , we  
 116 consider the single model  $M_m$  to be significant at level  $\beta$  in our Bayesian sense if

$$\mathbb{P}(\mathbf{c}_m^T \boldsymbol{\mu} > 0 | \mathbf{Y}) > 1 - \beta. \quad (5)$$

117 As in the case of the classic MCPMod, the maximum of these probabilities across all

118 candidate models are considered in order to obtain our test decision. A significant dose-  
119 response signal is established if

$$\max_{m \in \{1, \dots, M\}} \mathbb{P}(\mathbf{c}_m^T \boldsymbol{\mu} > 0 | \mathbf{Y}) > 1 - \beta.$$

120 The value of  $\beta$  needs to be picked so that type I error of the overall procedure is equal  
121 to the significance level  $\alpha$ , which is specified by the practitioner conducting the trial.

122 Under classic MCPMod, the probability on the left hand side of (5) can be computed  
123 numerically. This is, however, not feasible given the far more complicated model in our  
124 Bayesian setting. But we can approximate this probability using the  $\boldsymbol{\mu}$ -samples generated  
125 using the MCMC procedure. If we have obtained a total of  $N$  samples  $\boldsymbol{\mu}_1, \dots, \boldsymbol{\mu}_N$ , we  
126 can simply compute  $\mathbf{c}_m^T \boldsymbol{\mu}_i$  for each  $i$ . We count the number of samples that produces a  
127 positive  $\mathbf{c}_m^T \boldsymbol{\mu}_i$  and divide it by  $N$ , which we take to be our estimate of

$$\mathbb{P}(\mathbf{c}_m^T \boldsymbol{\mu} > 0 | \mathbf{Y}). \quad (6)$$

128 We summarise the procedure for checking the existence of non-flat relationship for the  
129 set of candidate models  $\mathcal{M}$ . This is the MCP part of the MCPMod. We fix a significance  
130 level  $\alpha$ , then we perform the following:

131 Step 1: Define a set of candidate models to represent the underlying true dose-response  
132 shape, and derive the optimal contrast coefficients from each model based. This  
133 step mirrors corresponding steps in MCPMod.

134 Step 2: Generate datasets of historical and current trials assuming the null model (i.e.  
135 flat dose responses). Estimate the threshold  $\beta$  using steps leading to (6) so that  
136 the desired type I error rate  $\alpha$  is achieved.

137 Step 3: With data  $\mathbf{Y}$ , test significance of each candidate model using (5) to assess whether  
138 a dose-response signal can be established. Proof of Concept (PoC) is established  
139 when at least one of the model tests is significant.

140 In this work, we focus on the MCP part of MCPMod. Given the  $\boldsymbol{\mu}$ -samples we have  
141 generated for each candidate model in Step 3 above, we can perform the modelling part  
142 of the MCPMod using steps in the classic MCPMod. This is straightforward so we leave  
143 out the details.

## 144 2.2. Bayesian pooling model/ Bayesian model based on pooled data

145 An easy way to account for historical data is to simply pool the historical data with  
146 the current data, resulting in the pooled dataset  $\mathbf{Y}^{(p)}$ . We end up with a special case of  
147 the Bayesian hierarchical model described in Section 2.1, with  $r = 0$ ,  $\mathbf{Y}^{(p)}$  replacing  $\mathbf{Y}^{(c)}$ ,  
148 and the elimination of  $\mathbf{Y}^{(h)}$  and the parameter  $a$ . More specifically,  $Y_{ij}^{(p)}$  describes the  
149 variable of interest in patient  $j$  of dose group  $i$  and is assumed to be normally distributed

$$Y_{ij}^{(p)} \mid \mu_i \sim N(\mu_i, \sigma^2), i = 0, \dots, K, j = 1, \dots, n_i$$

150 where  $\mu_i$  are the unknown mean effect of the treatment and  $\sigma^2$  is assumed to be known.

151 We follow the same steps as described in Section 2.1 to perform the MCP step. If  
152  $\boldsymbol{\mu}$  is given a non-informative prior, then the results obtained using our MCMC-based  
153 algorithm will converge to that of the classic MCPMod as the number of MCMC samples  
154 becomes large. We will compare our Bayesian hierarchical model with the Bayesian  
155 pooling model in Section 3.

## 156 2.3. Choice of contrast vectors

157 In classic MCPMod, contrast vectors are chosen to maximise the probability of re-  
158 jecting the null hypothesis when a candidate model is correct. MCPMod is relatively  
159 robust against non-optimal choice of contrast vectors. More specifically, even when the  
160 candidate model set does not contain the true underlying dose-response model, the prob-  
161 ability of detecting a non-flat dose-response shape is not greatly affected in the MCP  
162 step, as long as a dose-response model with a shape similar to that of the true shape of  
163 dose-response model is included in the candidate set.



164 In Pinheiro et al. (2014), MCPMod is extended to allow for an estimated  $\hat{\mu}$ , which  
165 can be estimated dose-response parameters using ANOVA or some other means. The  
166 estimates  $\hat{\mu}$  is assume to be distributed according to  $N(\mu, \mathbf{S})$  where  $\mathbf{S}$  denotes the vari-  
167 ance/covariance of  $\hat{\mu}$ . The matrix  $\mathbf{S}$  also needs to be estimated, producing  $\hat{\mathbf{S}}$ , which can  
168 be used to re-estimate the optimal contrast vectors. In our Bayesian setting, we use the  
169 posterior samples of  $\mu$  to produce  $\hat{\mathbf{S}}$ , which we use to re-estimate the optimal contrast  
170 vectors. Compared to the optimal contrast vectors calculated from the regular MCPMod,  
171 the re-estimated contrast vectors are data dependent and adjust the weight on difference  
172 dose groups automatically. For example, it will reduce the weight on doses where the  
173 posterior variance is large. As we will see in Section 3, this can improve the performance  
174 of our algorithm in certain cases.

175 We will use contrast vectors calculated according to the classic MCPMod as well as  
176 contrast vectors re-estimated using the posterior distribution in later simulation studies.

#### 177 *2.4. Heterogeneity of prognostic effects*

178 In (1), heterogeneity of prognostic effects between different trials, which is defined  
179 to be independent of effects of treatment, is primarily accounted for by  $r$ . Generally  
180 speaking, when we design a clinical study, we typically have some prior information  
181 about how similar this study is to a historical study. This is usually assessed based  
182 on the similarity of key factors that could impact the response, for example, the target  
183 study populations, the regions of the site, and the formulation or delivery route of the  
184 intervention, etc. In our setting, as described in (3), we impose a normal prior with  
185 mean 0 and standard deviation  $\tau$ . We impose a half-normal hyperprior on  $\tau$ . Following  
186 Neuenschwander et al. (2010), we adopt  $0.5\sigma$  as the standard deviation of the half-  
187 normal distribution. According to Friede et al. (2017),  $0.5\sigma$  is sufficient to capture typical  
188 heterogeneity values seen in meta-analyses of heterogeneous studies, making it a sensible  
189 choice in many applications. The sensitivity analyses for different levels of heterogeneity  
190 prior will be discussed in Appendix E. Although we use a half-normal distribution here, a  
191 more flexible distribution could also be considered, e.g., half-T, half-Cauchy, Gamma or

192 Inverse Gamma distributions (Spiegelhalter et al., 2004; Gelman, 2006; Polson & Scott,  
193 2012).

### 194 *2.5. Heterogeneity of predictive effects*

195 In (1), the parameter  $a$  serves to model heterogeneity of predictive factors between  
196 different trials. It describes the difference in treatment effect sizes between studies. The  
197 maximum effect in the historical study is  $a$  times the one in the current study. Typically,  
198 predictive factors have a greater influence on the results of analysis than prognostic  
199 factors. As described in (2), we impose a normal prior distribution (truncated under some  
200 circumstances) on  $a$ , with mean 1 and between-trial heterogeneity standard deviation  $\eta$ .  
201 When  $\eta = 0$  and  $a = 1$ , we have the same effect size between the historical and current  
202 trials, which means that there is no between-trial heterogeneity and therefore all data  
203 from two studies can be pooled for the analysis. The standard deviation  $\eta$  in the prior  
204 can be used to adjust the strength of prior information on  $a$ . We recommend plausible  
205 values of  $a$  to be inside the interval  $[1 - \eta, 1 + \eta]$ , i.e. within one standard deviation of  
206 the mean 1.

207 We truncate the prior distribution for  $a$  to an interval  $[b, 1/b]$  for some  $0 < b < 1$  if  
208  $\mathbf{Y}^{(c)}$  and  $\mathbf{Y}^{(h)}$  do not have exactly the same doses, i.e. there are doses that are present  
209 in one but the other trial. The reason for this is because in these cases, the posterior  
210 estimates for  $a$  are more unstable, thereby needing slightly more prior information to  
211 prevent  $a$  from becoming negative, which we deem as unrealistic. When we truncate the  
212 normal distribution, we typically pick  $b$  to be around  $1/3$ , since it is unlikely that two  
213 trials differ in treatment effect size by a factor of more than 3. We do not recommend  
214 taking  $b$  to be very close to 0, as it leads to the simulated posterior distribution  $a$  to be  
215 concentrated at 0, resulting in non-convergence of the simulated posterior distribution of  
216 treatment effects of dose groups. We find the choice  $b = 1/3$  gives robust results under  
217 our approach.

218 A log-normal distribution can also be used as the prior distribution of  $a$ . Since this dis-  
219 tribution samples only positive values, its performance is similar to that of the truncated

220 normal distribution.

### 221 3. Simulation studies

#### 222 3.1. Simulation design

223 To evaluate the performance of our method, we run simulation studies. We take  
 224  $\mathcal{D}_c = \{0, 0.15, 0.5, 0.8, 1\}$ , i.e. there are  $K = 4$  active doses with a placebo dose in the  
 225 current study. In the historic study, we consider two scenarios as described in Table 1a,  
 226 with 4 and 5 doses that overlaps those in the current study. We standardise the doses  
 227 and take the standard deviation to be 1. We take the true placebo response rate to be 0  
 228 and the maximal response to be 0.5. In what follows, we only consider equal allocation,  
 229 i.e., each dose group contains 40 patients, 200 patients in total in the current study. We  
 230 specify  $M = 6$  different location-scale models in the candidate model set  $\mathcal{M}$ , as shown  
 231 in Figure 1.

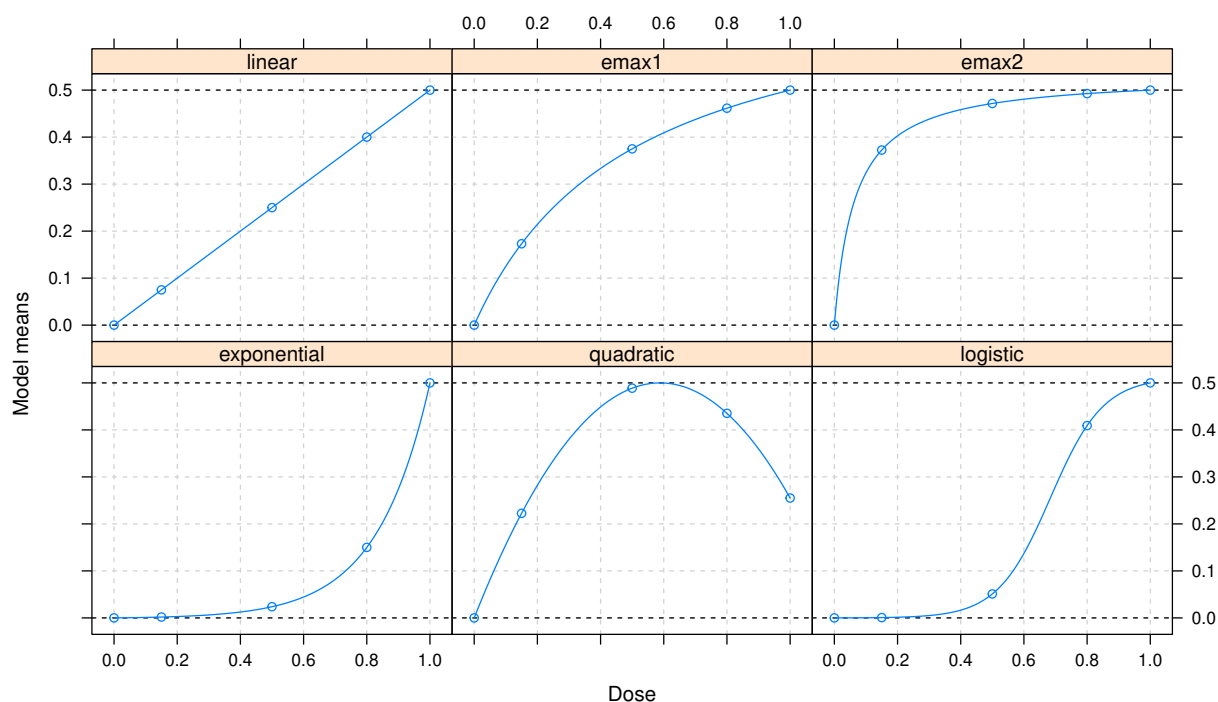

Figure 1: Visualisation of the candidate model set in the simulations.

232 Dose finding process in early stage usually contains a series of clinical trials for different  
 233 purposes, including dose escalation trial, proof of concept (PoC) trial and dose-ranging

234 trial. The Phase I dose escalation trial is usually the first time when a new drug is applied  
235 to humans. Such trial usually increases the doses of an investigational drug by cohorts,  
236 until an upper limit is reached, which is usually defined by the maximum tolerable dose.  
237 Sometimes it can also be based on a maximum feasible dose by formulation and delivery, or  
238 pharmacological active dose where the signal indicating the desired pharmacological effect  
239 is achieved. Although Phase I dose escalation trials are typically conducted in healthy  
240 volunteers and the efficacy data is not available, there are cases where the Phase I dose  
241 escalation trials need to be done in patients. Examples include investigating drugs for  
242 renal impaired patients where their PK profile will be different from healthy volunteers,  
243 or for drugs that may be toxic and cannot ethically be applied to healthy volunteers.  
244 After Phase I, a PoC needs to be established in early Phase II to make a Go/No-Go  
245 decision based on the efficacy performance. If the new drug demonstrates the efficacy,  
246 the concept is considered proven, leading to a Phase IIb dose-ranging trial. Therefore, a  
247 new dose-ranging trial can borrow historical information from a dose escalation trial or a  
248 PoC trial. In our simulation studies, we consider two scenarios: two dose escalation trials  
249 with different settings, as shown in Table 1a. We also consider an additional scenario  
250 (Phase IIa PoC trial) in Appendix D.

251 To evaluate the robustness of our method, we run three one-sided hypothesis tests in  
252 each scenario, which are summarised in Table 1b. Scenario A assumes the effect size of  
253 the historical trial is worse than the effect size of the current trial. The null hypothesis  
254 states that the treatment effect at each dose was the same as the placebo dose, and  
255 the alternative hypothesis states that at least one dose group has a positive treatment  
256 effect. Scenario B assumes that the treatment effect size of the historical trial exceeds the  
257 current trial. Definitions of the null and alternative hypotheses are the same as scenario  
258 A. In scenarios A and B, the results of the historical and current trials are basically  
259 homogeneous. The drug either worked in both trials or did not work in either.

260 In scenario C, however, we consider an extreme case of large discrepancies between the  
261 historical and the current trial. In scenarios A and B, the null and alternative hypotheses

| Scenario | Source                        | Dose set                                   | Number of overlapping doses |
|----------|-------------------------------|--------------------------------------------|-----------------------------|
| 1        | Phase I dose escalation trial | $\mathcal{D}_h = \{0, 0.15, 0.5, 0.8, 1\}$ | 5                           |
| 2        | Phase I dose escalation trial | $\mathcal{D}_h = \{0, 0.1, 0.5, 0.8, 1\}$  | 4                           |

(a) Two scenarios of historical trial. Dose set of current trial  $\mathcal{D}_c = \{0, 0.15, 0.5, 0.8, 1\}$ .

| Scenario |                        | $\Delta_c$                                         | $\Delta_h$ |
|----------|------------------------|----------------------------------------------------|------------|
| A        |                        |                                                    |            |
|          | Null hypothesis        | $H_0^m : \mathbf{c}_m^T \boldsymbol{\mu} = 0$      | 0 0        |
|          | Alternative hypothesis | $H_1^m : \mathbf{c}_m^T \boldsymbol{\mu} > 0$      | 0.5 0.3    |
| B        |                        |                                                    |            |
|          | Null hypothesis        | $H_0^m : \mathbf{c}_m^T \boldsymbol{\mu} = 0$      | 0 0        |
|          | Alternative hypothesis | $H_1^m : \mathbf{c}_m^T \boldsymbol{\mu} > 0$      | 0.3 0.5    |
| C        |                        |                                                    |            |
|          | Null hypothesis        | $H_0^m : \mathbf{c}_m^{(c)T} \boldsymbol{\mu} = 0$ | 0 0.3      |
|          | Alternative hypothesis | $H_1^m : \mathbf{c}_m^{(c)T} \boldsymbol{\mu} > 0$ | 0.5 0.3    |

(b) Three hypothetical scenarios in simulation study.  $\Delta_c =$  true effect size of current trial;  $\Delta_h =$  true effect size of historical trial;  $a = \Delta_h/\Delta_c$ ;  $\mathbf{c}_m^{(c)}$  = contrast vector of current trial (elements of dose groups in historical trial only are zeros).

Table 1: Simulation scenarios.

262 are built on the current and historical trials, but in scenario C, the null and alternative  
263 hypotheses are built on the current study only. More specifically, we take

$$\mathbf{c}_m^{(c)} = \begin{cases} \mathbf{c}_m & \text{if } m \in \mathcal{D}_c \\ 0 & \text{otherwise} \end{cases},$$

264 i.e. the test statistic does not take into account responses at doses not present in the  
265 current study. This scenario may arise from a situation where it is known that the drug  
266 has an effect in the historical trial and we investigate a new indication or population to  
267 find out whether the drug has an effect in the new trial. Differences in patient populations  
268 or other trial-specific circumstances can lead to large heterogeneity among historical trials  
269 and between the current trial and historical trials. In each scenario, we investigate four  
270 different levels of prognostic heterogeneity between the historical and current trials.

271 For each scenario, to assess the power to detect model  $m$  from the candidate model

272 set  $\mathcal{M}$ , we simulate datasets assuming model  $m$  to be the true dose-response curve. The  
273 data is generated according to the treatment effect that is assumed under the alternative  
274 hypothesis for the computation of power, or according to the null hypothesis for type I  
275 error computation. The steps for estimating power and type I error of our algorithm are  
276 shown in Appendix B.

277 As described in Section 2.4, a half-normal prior with standard deviation 0.5 (i.e.,  
278  $HN(0.5)$ ) is used for the between-study standard deviation of prognostic effects across  
279 scenarios A, B and C, and a truncated normal distribution with mean 1 and standard  
280 deviation 0.4 (i.e.,  $N_{[1/3,3]}(1, 0.4^2)$ ) is assigned for the effect ratio  $a$ . To compare our  
281 Bayesian hierarchical model (BHM), we also perform

- 282 1. a pooled Bayesian analysis that includes the data of all trials without accounting for  
283 between-trial heterogeneity,
- 284 2. an MCPMod analysis of only the current trial.

285 We use the Receiver Operating Characteristic (ROC) curve (Bradley, 1997; Fawcett,  
286 2006) to evaluate and compare operating characteristics from different approaches. An  
287 ROC curve plots the True Positive Rate (TPR) (sensitivity), also known as power, against  
288 the False Positive Rate (FPR) (i.e.,  $1 - \text{specificity}$ ), also known as type I error. In this  
289 paper, we plot ROC curves for  $\text{FPR} \in [0.025, 0.1]$ , which is a reasonable type I error  
290 range for dose finding trials.

## 291 *3.2. Simulation results*

### 292 *3.2.1. Scenario 1*

293 Here we consider a phase I dose escalation trial, where all dose groups in the historical  
294 trial are the same as those in the current trial, each with the same known variance  
295 and sample size. In Table 2a, we summarise powers achieved using various approaches  
296 at 5% type I error rate for the candidate model set illustrated in Figure 1. Amongst  
297 these approaches is MCPMod (full borrowing), where we simply pool data from both  
298 the historical and current studies to which we apply the classic MCPMod method. We

299 show the corresponding ROC curves in Figure 4. For all dose groups, the type I error  
300 is calculated with a true flat dose-response curve with response 0, and the power is  
301 calculated with a true non-flat dose-response curve.

302 We see from Table 2a and Figure 4 that MCPMod (no borrowing) yields the worst  
303 performance from the four approaches, which should be expected since borrowing from  
304 historical information can boost the power. MCPMod (full borrowing) and the Bayesian  
305 pooling model (BPM) have almost the same performance. In comparison, BHM yields  
306 better performance than all other approaches. This implies that modelling the between-  
307 trial heterogeneity can further improve the performance, i.e., BPM simply combines the  
308 historical and current trials into a single trial, but BHM discounts the historical infor-  
309 mation according to the between-trial heterogeneity. Note that here we use the optimal  
310 contrast vector derived from MCPMod rather than the re-estimated contrast vector, but  
311 these two contrasts are shown to reveal similar behaviours.

312 In the following, we will only focus on the analysis of the linear model. The other five  
313 models are expected to exhibit similar behaviour. The main purpose of the simulation  
314 study is to identify in each scenario which methods have good power. We generate data  
315 with four different levels of heterogeneity in prognostic factor effects,  $r = 0, 0.1, 0.2, 0.3$ ,  
316 respectively. For each scenario, we estimate the treatment effect size of the current study,  
317 which is the mean of 10,000 posterior means of  $\mu_5$ . This is shown in Table 2b.

318 Figure 2 compares the ROC curve of BHM and BPM as a function of  $FPR \in$   
319  $[0.025, 0.1]$  for four cases with different heterogeneities of prognostic factor under sce-  
320 nario 1A, 1B and 1C. We see that the ROC curves of BPM under scenarios 1A and 1B  
321 look similar to each other. This is because the treatment effect size of the pooled trial  
322 is the average effect size of two trials, hence BPM is mainly influenced by the average  
323 treatment effect of two trials. For BPM, since the prognostic factor effect  $r$  has opposite  
324 signs in the historical and current trials, different levels of heterogeneity in prognostic  
325 factor effects have no influence on the results, so that similar patterns of results are ob-  
326 served across four different values of  $r$ . Table 2b shows that BHM produces more accurate

| Approach              | Linear | E <sub>max</sub> 1 | E <sub>max</sub> 2 | Exponential | Quadratic | Logistic |
|-----------------------|--------|--------------------|--------------------|-------------|-----------|----------|
| MCPMod no borrowing   | 0.7901 | 0.7916             | 0.7752             | 0.7638      | 0.6793    | 0.8681   |
| MCPMod full borrowing | 0.8759 | 0.8763             | 0.8650             | 0.8579      | 0.7839    | 0.9356   |
| BPM                   | 0.8710 | 0.8705             | 0.8651             | 0.8563      | 0.7744    | 0.9334   |
| BHM                   | 0.8964 | 0.8983             | 0.8951             | 0.8902      | 0.8185    | 0.9493   |

(a) Power values for MCPMod (no borrowing), MCPMod (full borrowing), Bayesian pooling model (BPM) and Bayesian hierarchical model (BHM) for the candidate model set when controlling type I error at 5%. Note that the simulation error can be estimated using binomial error as  $\sqrt{\frac{p(1-p)}{n}}$  where  $p$  is the power value at 5% type I error and  $n$  is number of simulations. BHM = Bayesian hierarchical model; BPM = Bayesian pooling model.

| Scenario                                                       | Model | $ r  = 0$ | $ r  = 0.1$ | $ r  = 0.2$ | $ r  = 0.3$ |
|----------------------------------------------------------------|-------|-----------|-------------|-------------|-------------|
| Scenario 1A                                                    |       |           |             |             |             |
| Null hypothesis<br>( $\Delta_c = \Delta_h = 0$ )               |       | $r = 0$   | $r = 0.1$   | $r = 0.2$   | $r = 0.3$   |
|                                                                | BHM   | 0.0004    | 0.0027      | 0.0020      | 0.0016      |
|                                                                | BPM   | 0.0010    | -0.0006     | 0.0015      | 0.0023      |
| Alternative hypothesis<br>( $\Delta_c = 0.5, \Delta_h = 0.3$ ) |       | $r = 0$   | $r = 0.1$   | $r = 0.2$   | $r = 0.3$   |
|                                                                | BHM   | 0.4766    | 0.4782      | 0.4856      | 0.4892      |
|                                                                | BPM   | 0.4010    | 0.4019      | 0.4005      | 0.3971      |
| Scenario 1B                                                    |       |           |             |             |             |
| Null hypothesis<br>( $\Delta_c = \Delta_h = 0$ )               |       | $r = 0$   | $r = -0.1$  | $r = -0.2$  | $r = -0.3$  |
|                                                                | BHM   | 0.0011    | -0.0007     | 0.0009      | 0.0012      |
|                                                                | BPM   | 0.0001    | -0.0004     | 0.0016      | -0.0007     |
| Alternative hypothesis<br>( $\Delta_c = 0.3, \Delta_h = 0.5$ ) |       | $r = 0$   | $r = -0.1$  | $r = -0.2$  | $r = -0.3$  |
|                                                                | BHM   | 0.3828    | 0.3799      | 0.3752      | 0.3720      |
|                                                                | BPM   | 0.4002    | 0.4118      | 0.4011      | 0.3993      |
| Scenario 1C                                                    |       |           |             |             |             |
| Null hypothesis<br>( $\Delta_c = 0, \Delta_h = 0.3$ )          |       | $r = 0$   | $r = 0.1$   | $r = 0.2$   | $r = 0.3$   |
|                                                                | BHM   | 0.1157    | 0.1273      | 0.1201      | 0.1175      |
|                                                                | BPM   | 0.1509    | 0.1492      | 0.1458      | 0.1483      |
| Alternative hypothesis<br>( $\Delta_c = 0.5, \Delta_h = 0.3$ ) |       | $r = 0$   | $r = 0.1$   | $r = 0.2$   | $r = 0.3$   |
|                                                                | BHM   | 0.4718    | 0.4805      | 0.4863      | 0.4876      |
|                                                                | BPM   | 0.3992    | 0.4011      | 0.3998      | 0.4009      |

(b) Mean estimated treatment effect size under three simulation scenarios with four different levels of prognostic heterogeneity.  $\Delta_c$  = effect size of current trial;  $\Delta_h$  = effect size of historical trial. This table displays mean estimates of  $\Delta_c$ .

Table 2: Scenario 1.



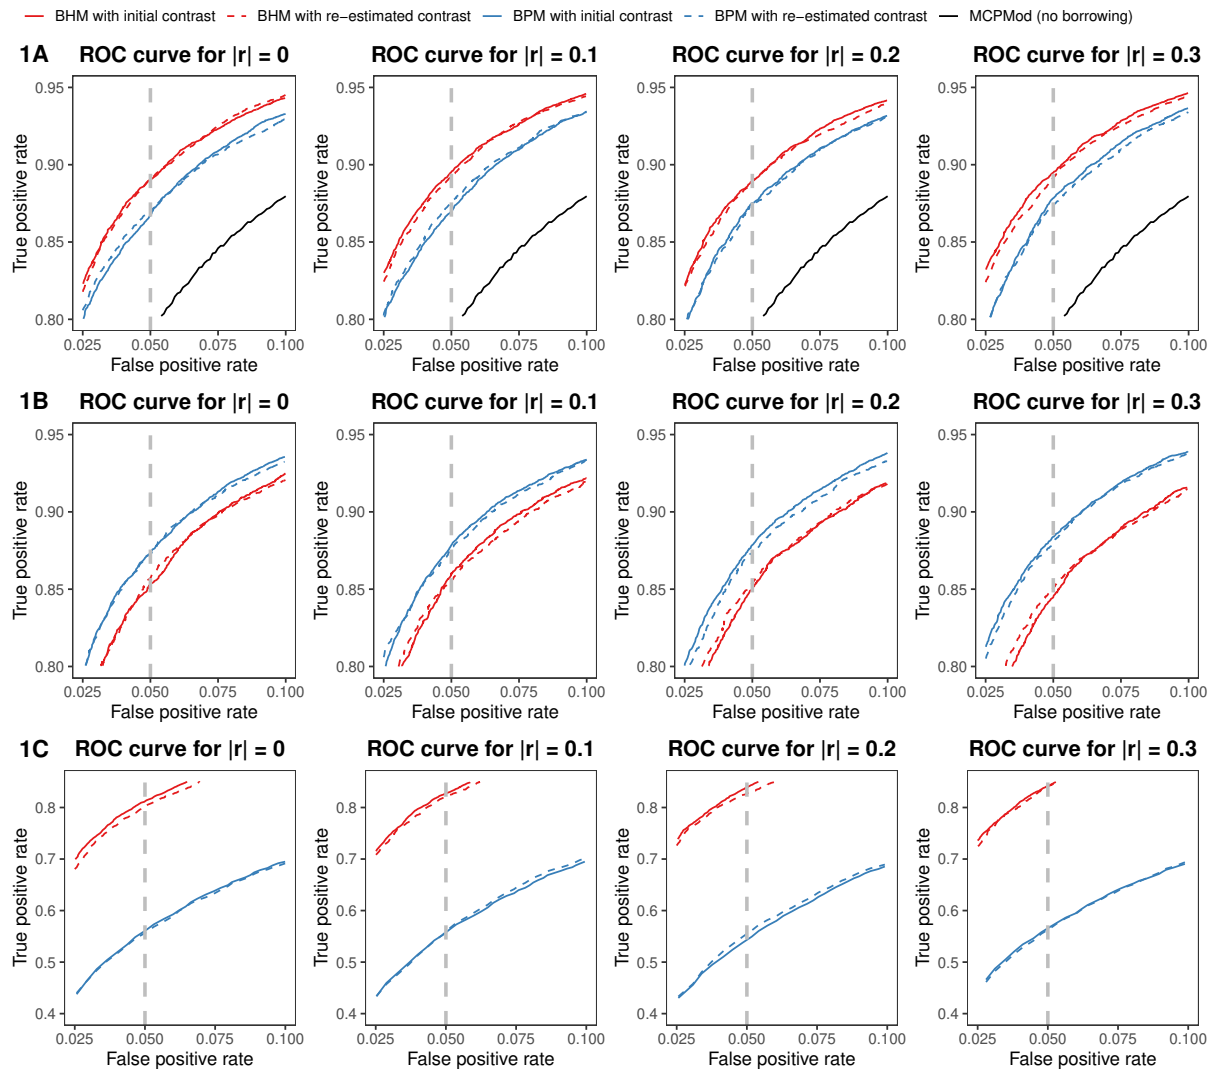

Figure 2: The ROC curves of MCPMod, Bayesian pooling model (BPM) and Bayesian hierarchical model(BHM) with four different levels of prognostic heterogeneity for scenario 1. The dashed grey line denotes 5% false positive rate, i.e., 5% type I error rate.

327 estimates of the effect size as the value of  $r$  increases. This is probably due to the prior  
 328  $HN(0.5)$  we use for the prognostic between-trial heterogeneity standard deviation rep-  
 329 resenting a large prognostics heterogeneity. Even though the bias becomes smaller with  
 330 the increase of the value of  $r$ , the ROC curves of BHM look similar to each other for all  
 331 four different values of  $r$ , as can be seen from Figure 2. The sensitivity analysis of the  
 332 results for prognostic heterogeneity will be discussed in Appendix E.

333 Under scenarios 1A and 1C, the ROC curve of BHM is always above the ROC curve  
 334 of BPM, but under scenario 1B, BPM performs better than BHM. We surmise this is due

335 to the fact that under scenario 1B where the effect size of the historical trial is higher  
336 than the current trial, BHM largely discounts the impact of historical data on the basis of  
337 observed divergence when incorporating historical information, leading to reduced power  
338 values. Even though BHM's ROC curve is below that of BPM under scenario 1B, the  
339 estimates of the effect size under BHM is more accurate.

340 With BPM, when the treatment effect size in the new trial is worse than that in the  
341 historical trial, the borrowing of historical information leads to overestimates of treatment  
342 effects across the active dose groups. Thus it leads to higher power but that comes at  
343 the cost of type I error inflation. Generally speaking, we would prefer to use BHM to  
344 perform dynamic borrowing where the amount of historical data borrowed is related to  
345 the agreement between the current and historical trial.

346 When historical treatment effect size differs from the current trial, BPM may not  
347 reflect the true treatment effect size. On the other hand, the posterior mean estimates  
348 of the true effect size using BHM has smaller bias. Compared to BPM, BHM is a better  
349 statistical analysis method that can reasonably boost statistical power while controlling  
350 type I error.

### 351 *3.2.2. Scenario 2*

352 Here we investigate a scenario where there is at least one non-overlapping dose between  
353 the historical and the current trial. In scenario 2, the current trial has a dose of 0.15  
354 but not 0.1, and the historical trial has a dose of 0.1 but not 0.15. The existence of  
355 non-overlapping doses has an influence on both BPM and BHM.

356 Table 3 displays the estimated treatment effects of dose groups 0.1 and 0.15 under sce-  
357 narios A, B and C. Apparently BHM produces more accurate estimates for these two dose  
358 groups, i.e. with smaller bias, than BPM. For both BHM and BPM, larger magnitudes  
359 in the level of prognostic heterogeneity  $r$  produces larger biases in the estimates.

360 Figure 3 displays ROC curves of both BHM and BPM, using both the initial contrast  
361 of MCPMod as well as re-estimated contrasts. Unlike in Scenario 1, we see that both  
362 BHM and BPM performs better if we use re-estimated contrast. We will focus on perfor-

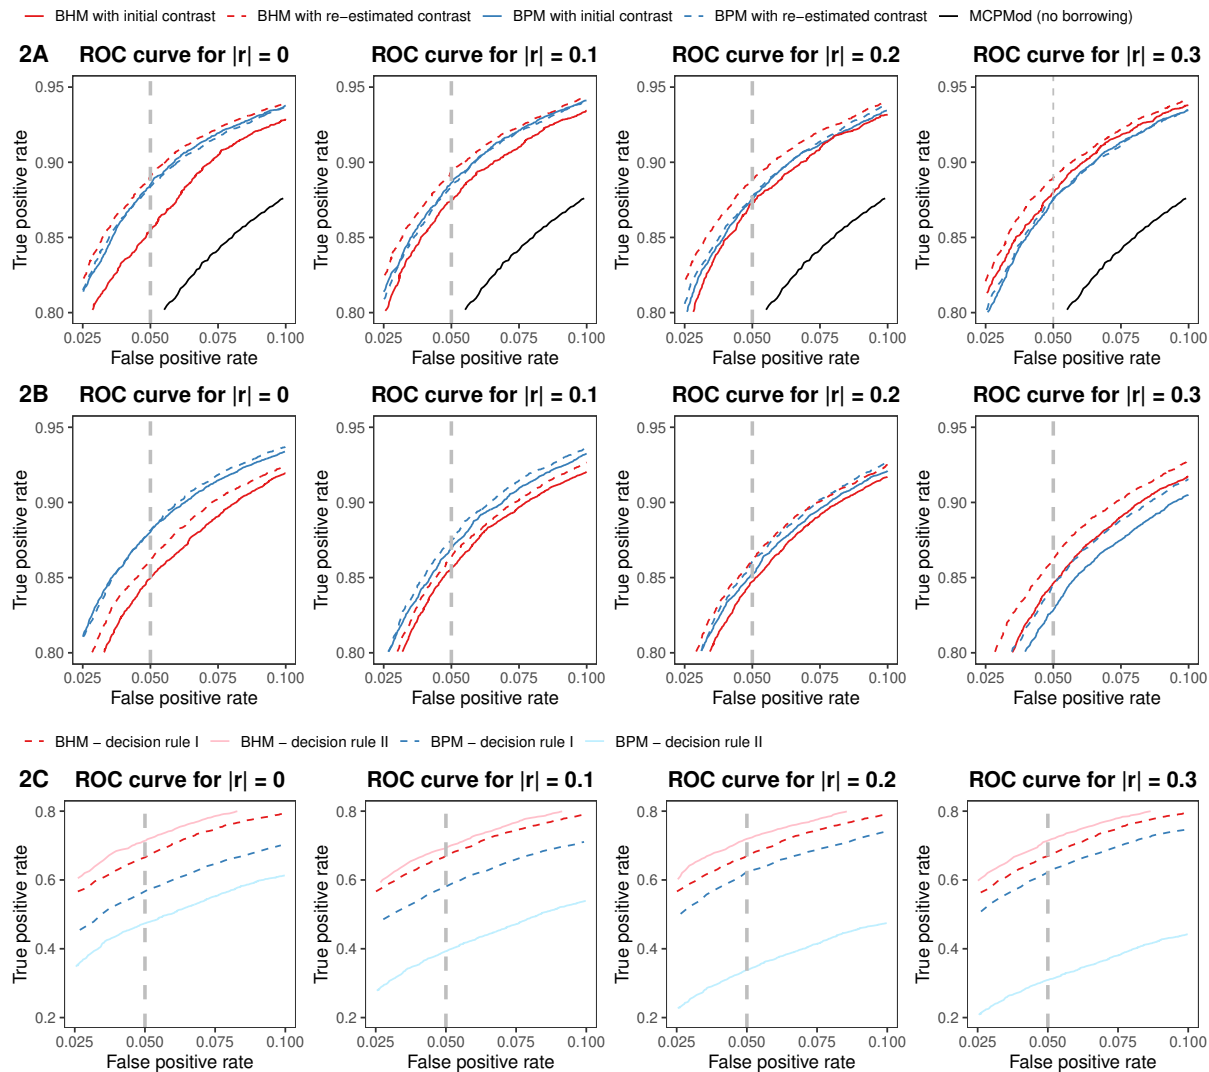

Figure 3: The ROC curves of MCPMod, Bayesian pooling model (BPM) and Bayesian hierarchical model (BHM) with four different levels of prognostic heterogeneity for scenario 2.

363 mance using re-estimated contrasts in the subsequent discussion. If there is no prognostic  
 364 heterogeneity (i.e.,  $r = 0$ ), we find BHM to have mixed performance compared to that  
 365 of BPM, sometimes better, sometimes worse. Indeed, when  $r = 0$ , the pooling model is  
 366 the correct model, but this is not the case if  $r \neq 0$ . Therefore we see the advantage of  
 367 BHM over BPM tends to increase as the level of prognostic heterogeneity increases. This  
 368 is caused by a decrease in the power of BPM as  $r$  increases, while the power of BHM  
 369 holds roughly steady. When type I error is controlled at 5%, the power of BPM went  
 370 from 0.8833 for  $r = 0$  to 0.8614 for  $r = 0.3$ .

371 As mentioned earlier, we use re-estimated contrast vector in this scenario, not the  
372 initial contrast vector derived from MCPMod which would lead to some power loss.  
373 Figure 5 displays boxplots of the estimated treatment effects of six dose groups for BPM  
374 and BHM. The estimates for the second and third doses, both of which only exists in one  
375 of the two trials, has larger variability. Results from scenarios 2A, 2B and 2C show similar  
376 effect. Therefore, it is beneficial to apply a re-estimation step based on the covariance  
377 matrix  $\hat{\mathbf{S}}$  after each MCMC simulation to derive a re-estimated contrast vector.

378 Under scenario 2C, we consider two decision rules to detect a significant PoC. The  
379 first one is using all of dose groups in current and historical trials (decision rule I) and the  
380 second one is using dose groups in the current trial only (decision rule II). The third row  
381 of Figure 3 compares the performance of BPM and BHM using these two decision rules.  
382 It shows that the ROC curve of BHM is above that of BPM with either decision rule.  
383 This is not surprising since BHM produces much more accurate estimates than BPM  
384 under scenario 2C, as shown in Table 3. We observe that BHM has better performance  
385 when using decision rule II as the dose found only in the historical trial is ignored. This  
386 indicates that even though we use a re-estimated contrast vector, the performance is also  
387 influenced by the non-overlapping doses. On the other hand, the ROC curve of BPM  
388 is higher with decision rule I than decision rule II. Therefore, when there exist non-  
389 overlapping doses between the historical and current trials, we recommend using decision  
390 rule II when the data is pooled.

#### 391 4. Discussion

392 In this paper, we proposed a Bayesian hierarchical model for dose finding trials that  
393 incorporates information from historical trials. The model can take into account both  
394 prognostic and predictive between-trial heterogeneities. We detailed how to set up a  
395 Bayesian multiple comparison procedure, how to choose contrast vectors, and how to  
396 check for a non-flat dose response given a desired type I error  $\alpha$ . We evaluated the per-  
397 formance of our model and illustrated the utility of our approach through three simulation

| Scenario                 | Model | $ r  = 0$ | $ r  = 0.1$ | $ r  = 0.2$ | $ r  = 0.3$ |
|--------------------------|-------|-----------|-------------|-------------|-------------|
| Scenario 2A              |       |           |             |             |             |
| Null hypothesis          |       | $r = 0$   | $r = 0.1$   | $r = 0.2$   | $r = 0.3$   |
| 0.10 ( $\mu_2 = 0$ )     | BHM   | 0.0058    | -0.0206     | -0.0247     | -0.0269     |
|                          | BPM   | 0.0035    | -0.1016     | -0.2006     | -0.3015     |
| 0.10 ( $\mu_3 = 0$ )     | BHM   | 0.0005    | 0.0168      | 0.0139      | 0.0121      |
|                          | BPM   | 0.0022    | 0.1004      | 0.1976      | 0.3032      |
| Alternative hypothesis   |       | $r = 0$   | $r = 0.1$   | $r = 0.2$   | $r = 0.3$   |
| 0.10 ( $\mu_2 = 0.030$ ) | BHM   | 0.0220    | -0.0264     | -0.0328     | -0.0375     |
|                          | BPM   | 0.0283    | -0.0714     | -0.1705     | -0.2681     |
| 0.15 ( $\mu_3 = 0.075$ ) | BHM   | 0.0820    | 0.0980      | 0.1019      | 0.1012      |
|                          | BPM   | 0.0807    | 0.1735      | 0.2725      | 0.3726      |
| Scenario 2B              |       |           |             |             |             |
| Null hypothesis          |       | $r = 0$   | $r = -0.1$  | $r = -0.2$  | $r = -0.3$  |
| 0.10 ( $\mu_2 = 0$ )     | BHM   | 0.0403    | 0.0255      | 0.0241      | 0.0258      |
|                          | BPM   | 0.0043    | 0.1021      | 0.2147      | 0.2975      |
| 0.15 ( $\mu_3 = 0$ )     | BHM   | 0.0004    | -0.0174     | -0.0159     | -0.0095     |
|                          | BPM   | 0.0046    | -0.1127     | -0.1965     | -0.3110     |
| Alternative hypothesis   |       | $r = 0$   | $r = -0.1$  | $r = -0.2$  | $r = -0.3$  |
| 0.10 ( $\mu_2 = 0.050$ ) | BHM   | 0.0519    | 0.0661      | 0.0683      | 0.0722      |
|                          | BPM   | 0.0507    | 0.1528      | 0.2439      | 0.3517      |
| 0.15 ( $\mu_3 = 0.045$ ) | BHM   | 0.0407    | -0.0294     | -0.0650     | -0.0803     |
|                          | BPM   | 0.0450    | -0.0547     | -0.1525     | -0.2526     |
| Scenario 2C              |       |           |             |             |             |
| Null hypothesis          |       | $r = 0$   | $r = 0.1$   | $r = 0.2$   | $r = 0.3$   |
| 0.10 ( $\mu_2 = 0.030$ ) | BHM   | 0.0292    | -0.0310     | -0.0402     | -0.0414     |
|                          | BPM   | 0.0276    | -0.1288     | -0.2276     | -0.3318     |
| 0.15 ( $\mu_3 = 0$ )     | BHM   | 0.0010    | 0.0307      | 0.0526      | 0.0757      |
|                          | BPM   | -0.0003   | 0.0963      | 0.2006      | 0.2988      |
| Alternative hypothesis   |       | $r = 0$   | $r = 0.1$   | $r = 0.2$   | $r = 0.3$   |
| 0.10 ( $\mu_2 = 0.030$ ) | BHM   | 0.0220    | -0.0264     | -0.0328     | -0.0375     |
|                          | BPM   | 0.0283    | -0.0714     | -0.1705     | -0.2681     |
| 0.15 ( $\mu_3 = 0.075$ ) | BHM   | 0.0820    | 0.0980      | 0.1019      | 0.1012      |
|                          | BPM   | 0.0807    | 0.1735      | 0.2725      | 0.3726      |

Table 3: Estimated treatment effect of two non-overlapping doses under three simulation scenarios with four different levels of prognostic heterogeneity. This table displays mean estimates of  $\mu_2$  or  $\mu_3$ . BHM = Bayesian hierarchical model; BPM = Bayesian pooling model.

398 studies, in comparison with the Bayesian pooling model, where data from both trials are  
399 pooled.

400 The main advantage of Bayesian hierarchical model lies in scenarios where there is a  
401 measurable difference between the behaviour of the historical and the new trials. Com-

402 pared to the Bayesian pooling model, the Bayesian hierarchical model produces more  
403 accurate estimates of the treatment effects in our simulation studies, even when the ef-  
404 fect sizes are different in the two trials. We used heavy-tailed hyperpriors for prognostic  
405 heterogeneity and truncated normal priors for predictive heterogeneity so that the results  
406 were not sensitive to the prior distribution. Even with an inappropriate prior distribu-  
407 tion, power usually does not differ too much, hence power values should not be strongly  
408 affected by prior-data conflicts. We provide more details on effects of prior-data conflicts  
409 in Appendix E.

410 One key limitation of our approach is that we assumed a fixed effect ratio across dif-  
411 ferent doses, which implies that a fixed relationship between the current and historical  
412 trials regardless of dose. In practice, however, this may not hold. This assumption can be  
413 relaxed and our approach can be extended to handle this situation, but extended model  
414 will have a larger number of unknown parameters. Our method under the assumption  
415 of a fixed effect ratio across different doses may be a good trade-off between model com-  
416 plexity and generality. Furthermore, in this work, we only consider the case of borrowing  
417 information from one historical dose finding trial. Our method can be easily extended to  
418 cases where information from multiple historical trials or parallel trials can be borrowed.

## 419 **References**

- 420 Berry, D. A. (2006). Bayesian clinical trials. *Nature Reviews Drug Discovery*, *5*, 27–36.
- 421 Bradley, A. P. (1997). The use of the area under the ROC curve in the evaluation of  
422 machine learning algorithms. *Pattern Recognition Letters*, *30*, 1145–1159.
- 423 Bretz, F., Pinheiro, J. C., & Branson, M. (2005). Combining multiple comparisons and  
424 modeling techniques in dose-response studies. *Biometrics*, *61*, 738–748.
- 425 European Medicines Agency (EMA) (2014). Qualification Opinion of MCP-  
426 Mod as an efficient statistical methodology for model-based design and anal-  
427 ysis of Phase II dose finding studies under model uncertainty. [https:](https://www.ema.europa.eu/en/qualifications/qualification-opinion-mcp-mod)

428 [//www.ema.europa.eu/en/documents/regulatory-procedural-guideline/  
429 qualification-opinion-mcp-mod-efficient-statistical-methodology-model-based-design-  
430 en.pdf](http://www.ema.europa.eu/en/documents/regulatory-procedural-guideline/qualification-opinion-mcp-mod-efficient-statistical-methodology-model-based-design-en.pdf).

431 Fawcett, T. (2006). An introduction to ROC analysis. *Pattern Recognition Letters*, 27,  
432 861–874.

433 Fleischer, F., Bossert, S., Deng, Q., Loley, C., & Gierse, J. (2022). Bayesian MCPMod.  
434 *Pharmaceutical Statistics*, . doi:10.1002/pst.2193.

435 Friede, T., Röver, C., Wandel, S., & Neuenschwander, B. (2017). Meta-analysis of two  
436 studies in the presence of heterogeneity with applications in rare diseases. *Biometrical  
437 Journal*, 59, 658–671.

438 Gelman, A. (2006). Prior distributions for variance parameters in hierarchical models.  
439 *Bayesian Analysis*, 1, 515–534.

440 Hobbs, B. P., Sargent, D. J., & Carlin, B. P. (2012). Commensurate priors for incorporat-  
441 ing historical information in clinical trials using general and generalized linear models.  
442 *Bayesian Analysis*, 7, 639–674.

443 Ibrahim, J. G., & Chen, M.-H. (2000). Power prior distributions for regression models.  
444 *Statistical Science*, 15, 46–60.

445 Neuenschwander, B., Capkun-Niggli, G., Branson, M., & Spiegelhalter, D. J. (2010).  
446 Summarizing historical information on controls in clinical trials. *Clinical Trials*, 7,  
447 5–18.

448 Pinheiro, J., Bornkamp, B., Glimm, E., & Bretz, F. (2014). Model-based dose finding  
449 under model uncertainty using general parametric models. *Statistics in Medicine*, 33,  
450 1646–1661.

451 Polson, N. G., & Scott, J. G. (2012). On the half-Cauchy prior for a global scale param-  
452 eter. *Bayesian Analysis*, 7, 887–902.

- 453 Röver, C., Bender, R., Dias, S., Schmid, C. H., Schmidli, H. et al. (2021). On weakly  
454 informative prior distributions for the heterogeneity parameter in Bayesian random-  
455 effects meta-analysis. *Research Synthesis Methods*, *12*, 448–474.
- 456 Schmidli, H., Gsteiger, S., Roychoudhury, S., O’Hagan, A., Spiegelhalter, D. et al. (2014).  
457 Robust meta-analytic-predictive priors in clinical trials with historical control informa-  
458 tion. *Biometrics*, *70*, 1023–1032.
- 459 Spiegelhalter, D. J., Abrams, K. R., & Myles, J. P. (2004). *Bayesian Approaches to*  
460 *Clinical Trials and Health-care Evaluation*. Chichester: John Wiley & Sons.
- 461 USA Food and Drug Administration (FDA) (2016). Statistical review and evaluation  
462 qualification of statistical approach: MCP-Mod. [https://www.fda.gov/downloads/](https://www.fda.gov/downloads/Drugs/DevelopmentApprovalProcess/UCM508701.pdf)  
463 [Drugs/DevelopmentApprovalProcess/UCM508701.pdf](https://www.fda.gov/downloads/Drugs/DevelopmentApprovalProcess/UCM508701.pdf).



## 464 A. Metropolis-Hasting algorithm

465 For each time step  $t$ , our algorithm consists of the following steps:

466 Step 1: Generate a proposal sample  $\boldsymbol{\theta}^{\text{cand}} = (\boldsymbol{\mu}^{\text{cand}}, a^{\text{cand}}, r^{\text{cand}}, \tau^{\text{cand}})$  from the pro-  
467 posal distribution  $q(\boldsymbol{\theta}^t | \boldsymbol{\theta}^{t-1})$ ;

468 Step 2: Compute the acceptance probability via the acceptance function

$$A(\boldsymbol{\theta}^{\text{cand}} | \boldsymbol{\theta}^{(t-1)}) = \min \left\{ 1, \frac{p(\boldsymbol{\theta}^t | \mathbf{Y}) q(\boldsymbol{\theta}^t | \boldsymbol{\theta}^{t-1})}{p(\boldsymbol{\theta}^{t-1} | \mathbf{Y}) q(\boldsymbol{\theta}^{t-1} | \boldsymbol{\theta}^t)} \right\}$$

469 based on the proposal distribution and the joint density function (4).

470 Step 3: Accept the candidate sample with probability  $A$ , i.e. take  $\boldsymbol{\theta}^{t-1} = \boldsymbol{\theta}^{\text{cand}}$ . Other-  
471 wise, reject the candidate sample and take  $\boldsymbol{\theta}^{t-1} = \boldsymbol{\theta}^{t-1}$ .

472 These steps are repeated until a sufficient number of posterior samples have been gener-  
473 ated.

474 We run 500,000 MCMC iterations for each replicate. We discard the first 5,000 itera-  
475 tions as burn-in and then thin the remaining output by keeping every tenth observation.

## 476 B. Steps for estimating power

477 The steps for estimating power of our algorithm for fixed values of  $a$ ,  $r$  and  $\alpha$  are as  
478 follows:

479 Step 1: repeat the following steps 10000 times:

480 1a. Generate  $\mathbf{Y}^{(c)}$  and  $\mathbf{Y}^{(h)}$  assuming model  $m$  to be flat, using (1).

481 1b. Repeat steps of Metropolis-Hastings (MH) algorithm described above until a  
482 sufficient number of samples of the parameters  $\boldsymbol{\mu}$  have been obtained.

483 1c. Calculate the probability  $\max_{m \in \{1, \dots, M\}} \mathbb{P}(\mathbf{c}_m^T \boldsymbol{\mu} > 0 | \mathbf{Y})$ .

484 Step 2: use points with a spacing of 0.0001 from 0 to 1 as thresholds to estimate type I  
485 errors (i.e.,  $\max_{m \in \{1, \dots, M\}} \mathbb{P}(\mathbf{c}_m^T \boldsymbol{\mu} > 0 | \mathbf{Y}) > c$ , for  $c \in [0, 1]$ ) and choose a specific  
486 threshold  $\alpha$  such that the desired type I error 5% is achieved.

487 Step 3: repeat the following steps 10000 times:

488 3a. Generate  $\mathbf{Y}^{(c)}$  and  $\mathbf{Y}^{(h)}$  assuming model  $m$  to be true, using (1).

489 3b. Repeat steps of Metropolis-Hastings (MH) algorithm described above until a  
490 sufficient number of samples of the parameters  $\boldsymbol{\mu}$  have been obtained.

491 3c. Calculate the probability  $\max_{m \in 1, \dots, M} \mathbb{P}(\mathbf{c}_m^T \boldsymbol{\mu} > 0 | \mathbf{Y})$ .

492 Step 4: use the obtained threshold  $\alpha$  in Step 2 and count how many times the test  
493 decision is significant (i.e.,  $\max_{m \in 1, \dots, M} \mathbb{P}(\mathbf{c}_m^T \boldsymbol{\mu} > 0 | \mathbf{Y}) > 1 - \alpha$ ), this proportion  
494 of simulations for which the null hypothesis is rejected is the estimate of the  
495 power of the test.

## 496 C. Figures

### 497 C.1. Figure for scenario 1

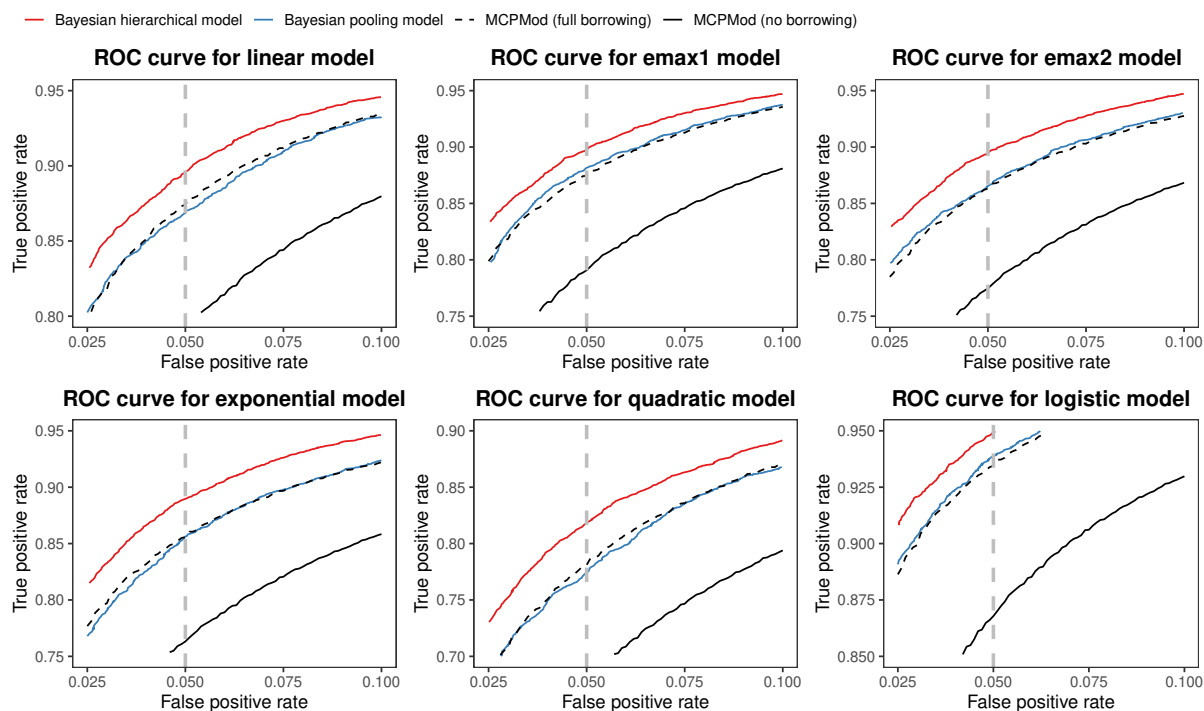

Figure 4: The ROC curves of MCPMod, Bayesian pooling model (BPM) and Bayesian hierarchical model (BHM) across six candidate models for scenario 1A.

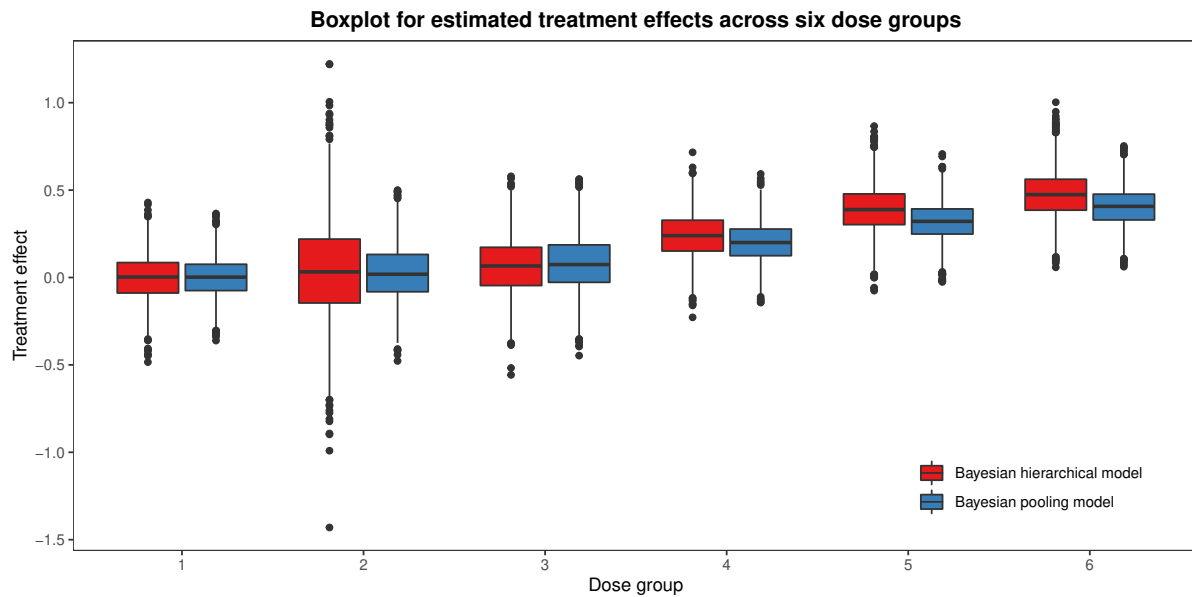

Figure 5: Boxplot of estimated treatment effects across different doses of Bayesian hierarchical model (BHM) and Bayesian pooling model (BPM) under scenario 2A.

498 *C.2. Figure for scenario 2*

#### 499 **D. Scenario 3: a phase II PoC trial**

500 Scenario 3 is a phase II PoC trial, where two high doses are compared to a placebo  
501 dose (i.e.,  $\mathcal{D}_h = \{0, 0.8, 1\}$ ). We run our method with same settings as in Section 3.

502 Table 4 displays power across six candidate models when type I error is controlled at  
503 5%. We generate the response data under six dose-response models in Figure 1 as the  
504 true underlying dose-response model without prognostic heterogeneity ( $r = 0$ ). We apply  
505 three methods, including MCPMod (no borrowing), BPM (pooling) and BHM (dynamic  
506 borrowing), to the dataset under scenario 3A. Both BPM and BHM result in a higher  
507 power than the no borrowing model for all of six candidate models. Under 5 of the  
508 6 dose-response models, BHM outperforms BPM. The only exception is the quadratic  
509 model. The ROC curves of six candidate models are shown in Figure 6.

510 Figure 7 shows the ROC curves of MCPMod, BPM and BHM with four levels of  
511 prognostic heterogeneity for scenario 3. Results and finding for BHM under scenario 3  
512 are similar to scenarios 1 and 2. However, the behaviour of BPM is different from scenarios  
513 1 and 2. Under scenarios 3A and 3C, as the level of prognostic heterogeneity increases,

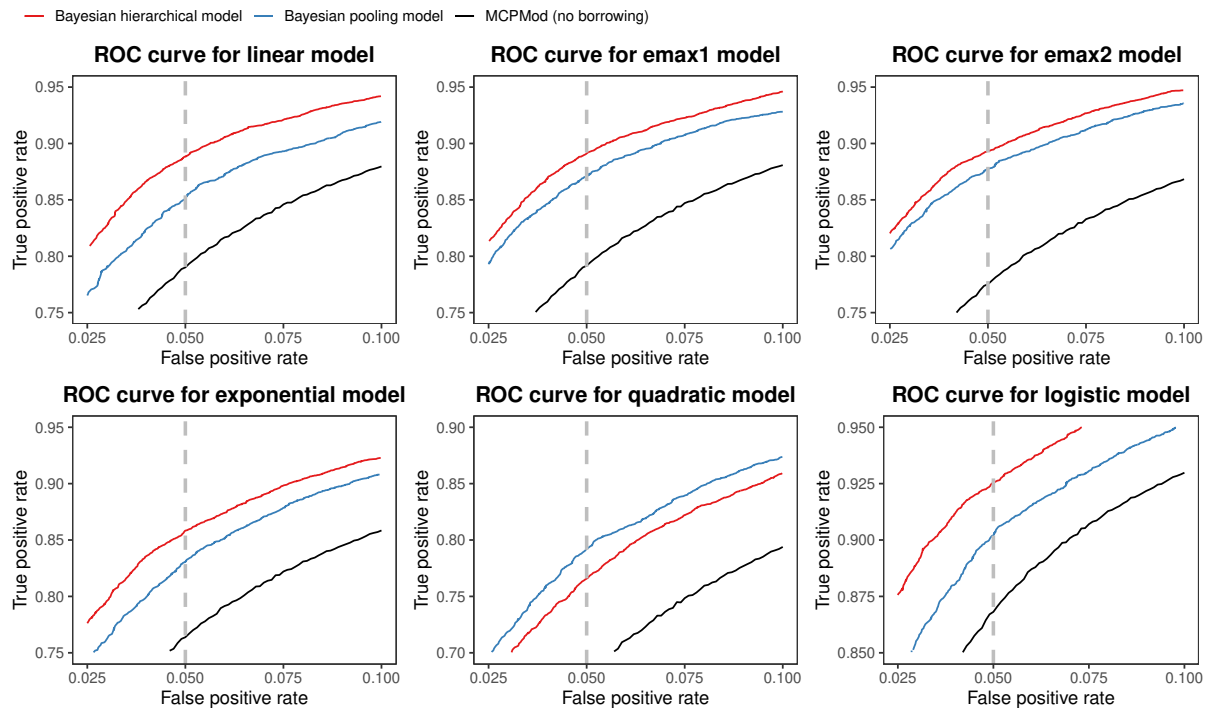

Figure 6: The ROC curves of MCPMod (no borrowing), Bayesian pooling model (BPM) and Bayesian hierarchical model (BHM) across six candidate models for scenario 3A.

| Approach            | Linear | Emax1  | Emax2  | Exponential | Quadratic | Logistic |
|---------------------|--------|--------|--------|-------------|-----------|----------|
| MCPMod no borrowing | 0.7901 | 0.7916 | 0.7752 | 0.7638      | 0.6793    | 0.8681   |
| BPM                 | 0.8517 | 0.8711 | 0.8777 | 0.8309      | 0.7930    | 0.9022   |
| BHM                 | 0.8884 | 0.8915 | 0.8936 | 0.8588      | 0.7665    | 0.9278   |

Table 4: Power values for MCPMod (no borrowing), Bayesian pooling model (BPM) and Bayesian hierarchical model (BHM) for the candidate model set when controlling type I error at 5%.

514 the ROC curve of BPM lower significantly indicating that it is more sensitive to the  
 515 heterogeneity of prognostic effects. Table 5 shows the estimated treatment effects of non-  
 516 overlapping dose groups. It shows BHM produces a much smaller bias in the treatment  
 517 effect estimates across nearly all scenarios and level of prognostic heterogeneity only has  
 518 little influence on the treatment effect estimates. On the other hand, BPM produces a  
 519 large bias in the treatment effect estimates of non-overlapping dose groups and as the  
 520 level of prognostic heterogeneity increases, there is an obvious increase in bias under all  
 521 scenarios. There is a large bias in the estimated treatment effects of non-overlapping  
 522 dose groups using BPM. These two non-overlapping dose groups are in the current trial

| Scenario                 | Model | $ r  = 0$ | $ r  = 0.1$ | $ r  = 0.2$ | $ r  = 0.3$ |
|--------------------------|-------|-----------|-------------|-------------|-------------|
| Scenario 3A              |       |           |             |             |             |
| Null hypothesis          |       | $r = 0$   | $r = 0.1$   | $r = 0.2$   | $r = 0.3$   |
| 0.15 ( $\mu_2 = 0$ )     | BHM   | 0.0014    | 0.0150      | 0.0219      | 0.0228      |
|                          | BPM   | 0.0023    | 0.1000      | 0.1996      | 0.2994      |
| 0.50 ( $\mu_3 = 0$ )     | BHM   | 0.0015    | 0.0182      | 0.0177      | 0.0252      |
|                          | BPM   | 0.0006    | 0.1033      | 0.1988      | 0.3024      |
| Alternative hypothesis   |       | $r = 0$   | $r = 0.1$   | $r = 0.2$   | $r = 0.3$   |
| 0.15 ( $\mu_2 = 0.075$ ) | BHM   | 0.0737    | 0.0987      | 0.1098      | 0.1119      |
|                          | BPM   | 0.0713    | 0.1738      | 0.2738      | 0.3702      |
| 0.50 ( $\mu_3 = 0.250$ ) | BHM   | 0.2541    | 0.2730      | 0.2879      | 0.2873      |
|                          | BPM   | 0.2504    | 0.3525      | 0.4484      | 0.5511      |
| Scenario 3B              |       |           |             |             |             |
| Null hypothesis          |       | $r = 0$   | $r = -0.1$  | $r = -0.2$  | $r = -0.3$  |
| 0.15 ( $\mu_2 = 0$ )     | BHM   | 0.0014    | 0.0150      | 0.0219      | 0.0228      |
|                          | BPM   | 0.0023    | 0.1000      | -0.1996     | -0.2994     |
| 0.50 ( $\mu_3 = 0$ )     | BHM   | 0.0015    | 0.0182      | 0.0177      | 0.0252      |
|                          | BPM   | 0.0006    | -0.1033     | -0.1988     | -0.3024     |
| Alternative hypothesis   |       | $r = 0$   | $r = -0.1$  | $r = -0.2$  | $r = -0.3$  |
| 0.15 ( $\mu_2 = 0.045$ ) | BHM   | 0.0960    | 0.0829      | 0.0812      | 0.0791      |
|                          | BPM   | 0.0437    | -0.0578     | -0.1510     | -0.2551     |
| 0.50 ( $\mu_3 = 0.150$ ) | BHM   | 0.1999    | 0.1937      | 0.1934      | 0.1902      |
|                          | BPM   | 0.1526    | 0.0513      | -0.0473     | -0.1554     |
| Scenario 3C              |       |           |             |             |             |
| Null hypothesis          |       | $r = 0$   | $r = 0.1$   | $r = 0.2$   | $r = 0.3$   |
| 0.15 ( $\mu_2 = 0$ )     | BHM   | -0.0012   | 0.0290      | 0.0576      | 0.0796      |
|                          | BPM   | 0.0045    | 0.0991      | 0.2010      | 0.3010      |
| 0.50 ( $\mu_3 = 0$ )     | BHM   | 0.0010    | 0.0307      | 0.0526      | 0.0757      |
|                          | BPM   | 0.0013    | 0.0964      | 0.1979      | 0.2960      |
| Alternative hypothesis   |       | $r = 0$   | $r = 0.1$   | $r = 0.2$   | $r = 0.3$   |
| 0.15 ( $\mu_2 = 0.075$ ) | BHM   | 0.0737    | 0.0987      | 0.1098      | 0.1119      |
|                          | BPM   | 0.0713    | 0.1738      | 0.2738      | 0.3702      |
| 0.50 ( $\mu_3 = 0.250$ ) | BHM   | 0.2541    | 0.2730      | 0.2879      | 0.2873      |
|                          | BPM   | 0.2504    | 0.3525      | 0.4484      | 0.5511      |

Table 5: Estimated treatment effect of two non-overlapping dose groups under three simulation scenarios with four different levels of prognostic heterogeneity. BHM = Bayesian hierarchical model; BPM = Bayesian pooling model.

523 only, which means that when the effect size of the current trial is larger than that in the  
524 historical trial, BPM overestimates the treatment effects of these two dose groups. In  
525 contrast, when the effect size of the current trial is smaller than that in the historical trial,  
526 BPM underestimates the treatment effect of these two dose groups. Under scenario 3B,

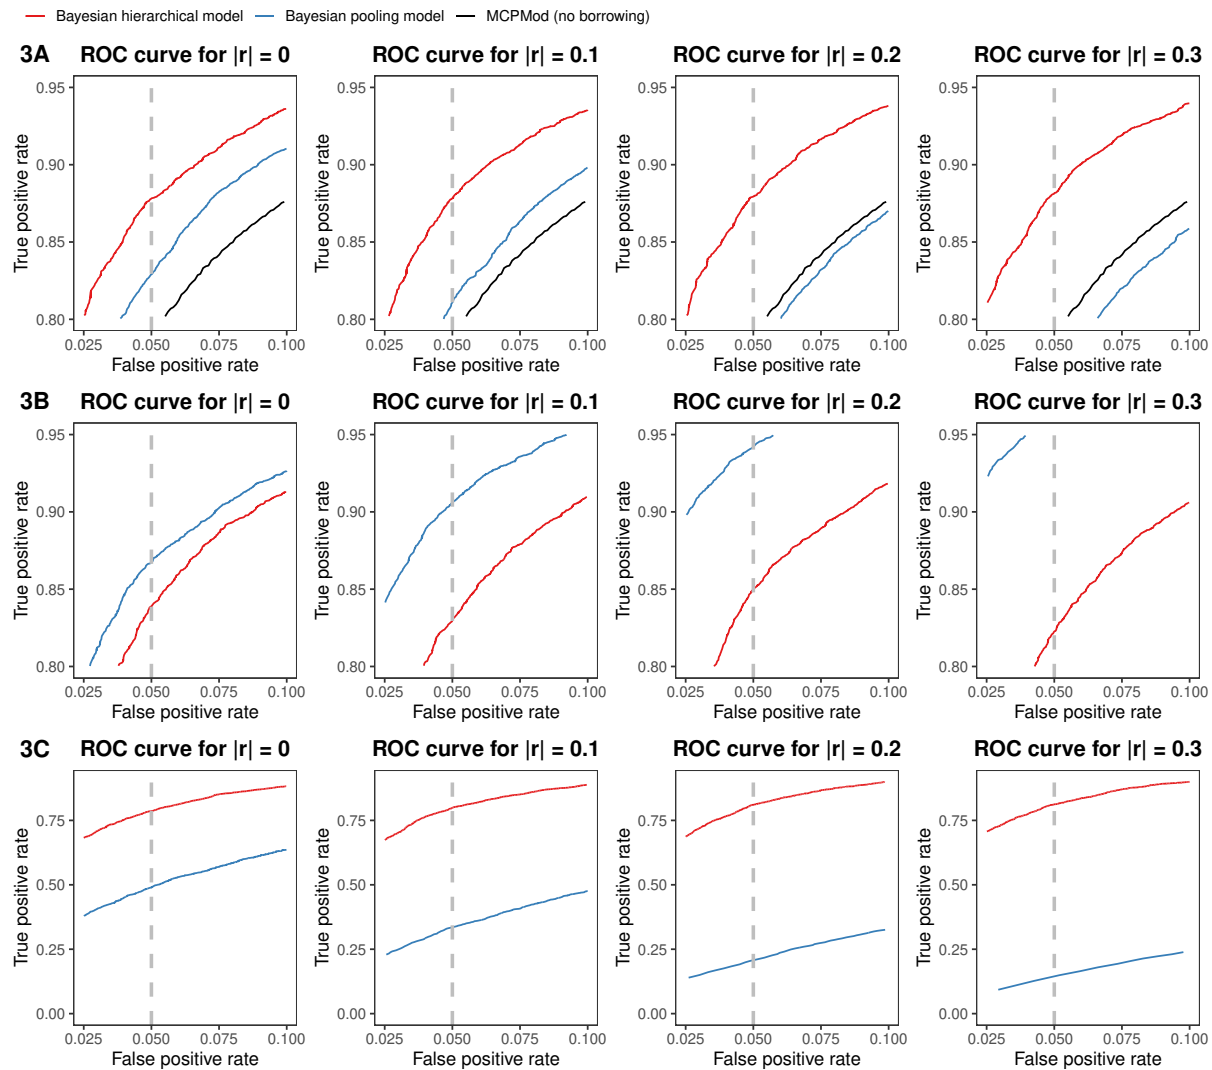

Figure 7: The ROC curves of MCPMod, Bayesian pooling model (BPM) and Bayesian hierarchical model (BHM) with four different levels of prognostic heterogeneity for scenario 3.

527 Figure 7 shows that the gap between ROC curves of BPM and BHM increase significantly  
 528 as the prognostic heterogeneity increases. The power values at 5% type I error for BPM  
 529 increases gradually from 0.8682 for  $r = 0$  to 0.9616 for  $r = 0.3$ . The optimal contrast  
 530 coefficients of these two dose groups for the linear dose-response curve are negative. But  
 531 the estimates of  $\mu_2$  and  $\mu_3$  under the alternative hypothesis have the wrong sign. This  
 532 leads to an increase in the power of BPM.

533 In summary, our simulation studies show that BHM can estimate treatment effects of  
 534 each dose group more accurately than BPM when there exists heterogeneity of prognostic

535 effects, especially for non-overlapping dose groups, resulting in higher statistical power  
536 for fixed type I error.

## 537 E. Prior-data conflicts

538 For the historical trial, there is usually a reasonable amount of information from  
539 internal or external company databases, literature and expert opinions that can be used  
540 to formulate an appropriate prior of prognostic and predictive heterogeneities. There  
541 may exist a mismatch observed between the prior and the data. For this purpose this  
542 section will investigate the impact of prior-data conflicts on the performance of BHM  
543 under scenarios 1A, 2A and 3A.

544 We will first discuss prior-data conflict of heterogeneity of prognostic effects. We  
545 assume that information on prognostic factors from the current and historical trials can be  
546 constructed as informative hyperpriors. In the following simulations, we fix the standard  
547 deviation of prior of the effect size  $a$  at  $\eta = 0.4$  and generate data from two extreme  
548 values of  $r = 0$  and  $r = 0.5$ . For the heterogeneity of prognostic effects, we consider  
549 five half-normal prior distributions with scales 0.0625, 0.125, 0.25, 0.5 and 1.0 for the  
550 prognostic between-study standard deviation  $\tau$ . These specifications include up to small,  
551 moderate, substantial, large and very large heterogeneity, respectively.

| Scale of half-normal prior distribution | 1      | 0.5    | 0.25   | 0.125  | 0.0625 |
|-----------------------------------------|--------|--------|--------|--------|--------|
| $r = 0$                                 |        |        |        |        |        |
| Scenario 1A                             | 0.4821 | 0.4854 | 0.4815 | 0.4991 | 0.5013 |
| Scenario 2A                             | 0.4912 | 0.4913 | 0.4997 | 0.4997 | 0.5009 |
| Scenario 3A                             | 0.4638 | 0.4645 | 0.4766 | 0.4868 | 0.4946 |
| $r = 0.5$                               |        |        |        |        |        |
| Scenario 1A                             | 0.4912 | 0.4913 | 0.5067 | 0.5152 | 0.5273 |
| Scenario 2A                             | 0.4952 | 0.5017 | 0.5118 | 0.5203 | 0.5287 |
| Scenario 3A                             | 0.4920 | 0.5052 | 0.5190 | 0.5249 | 0.5291 |

Table 6: Estimated treatment effect size using different scales of half-normal prior distribution for three scenarios. The true effect size is 0.5 ( $\Delta_c = 0.5$ ).

552 Table 6 summarises effect size estimates using half-normal prior distribution with

| Scale of half-normal prior distribution | 1      | 0.5    | 0.25   | 0.125  | 0.0625 |
|-----------------------------------------|--------|--------|--------|--------|--------|
| <i>r</i> = 0                            |        |        |        |        |        |
| Scenario 1A                             | 0.8891 | 0.8917 | 0.8905 | 0.8935 | 0.8943 |
| Scenario 2A                             | 0.8853 | 0.8879 | 0.8851 | 0.8859 | 0.8893 |
| Scenario 3A                             | 0.8689 | 0.8769 | 0.8806 | 0.8831 | 0.8864 |
| <i>r</i> = 0.5                          |        |        |        |        |        |
| Scenario 1A                             | 0.8816 | 0.8922 | 0.8899 | 0.8892 | 0.8835 |
| Scenario 2A                             | 0.8831 | 0.8905 | 0.8831 | 0.8827 | 0.8773 |
| Scenario 3A                             | 0.8701 | 0.8769 | 0.8699 | 0.8667 | 0.8614 |

Table 7: Power values at 5% type I error using different scales of half-normal prior distribution for three scenarios.

553 five different scales. Generally speaking, when the scale of half-normal distribution is  
554 approximately equal to the value of prognostic effect  $r$ , incorporating historical data on  
555 the treatment effect leads to little bias in the estimate. For example, in the case of  
556  $r = 0$ , effect size estimates using scale 0.0625 were more accurate than other scales.  
557 This is because more accurate hyperparameters for the hyper priors are used resulting  
558 in more accurate effect size estimates for the current trial. The scale of the half-normal  
559 distribution exceeding the value of prognostic effect will result in overestimates the effects  
560 size with increasing bias as the level of prognostic heterogeneity increases.

561 Table 7 shows power values for the linear model of the candidate model set using  
562 half-normal distribution with five levels of prognostic heterogeneity in the hyperprior for  
563 the between-trial standard deviation  $\tau$ . When there is no prior-data conflict, the effect  
564 size can be estimated more accurately using the appropriate prior distribution, resulting  
565 in higher power. In contrast, as the discrepancy between the true prognostic effect of the  
566 data and the prior increases, so does the probability of prior-data conflict, which can lead  
567 to increases in bias and losses in power. However, power values of half-normal prior dis-  
568 tribution with different scales differ slightly, the difference between the maximum power  
569 and the minimum power is approximately only 0.1. Using heavy-tailed distributions as  
570 hyperpriors has the advantage of ensuring some degree of robustness against prior mis-  
571 specification, reducing the effects of prior-data conflicts. Even if the historical trial is



572 similar to the current study in their specification, we believe that prior-data conflict may  
 573 still occur because of additional unanticipated factors. In such situations we recommend  
 574 using weakly informative half-normal priors  $HN(0.5)$  that captures heterogeneity values  
 575 typically seen in meta-analyses of heterogeneous studies and will therefore be a sensible  
 576 choice in many applications.

577 Next, we consider the prior-data conflict for the heterogeneity of predictive effects.  
 578 As discussed in Section 2.5, the choice of the value of the standard deviation  $\eta$  is critical.  
 579 In these simulations, we use  $HN(0.5)$  as the prior of prognostic between-heterogeneity  
 580 standard deviation  $\tau$  and generate data from  $r = 0$ . For the heterogeneity of treatment  
 581 effects (i.e., the effects ratio  $a$ ), we consider truncated normal distribution with the same  
 582 mean 1 and seven values of standard deviation  $\eta$ .

| Value of $\eta$ | 0.1    | 0.2    | 0.3    | 0.4    | 0.5    | 1      | 2      | pooling |
|-----------------|--------|--------|--------|--------|--------|--------|--------|---------|
| Scenario 1A     | 0.4097 | 0.4390 | 0.4796 | 0.4998 | 0.5072 | 0.5367 | 0.5458 | 0.4020  |
| Scenario 2A     | 0.4112 | 0.4439 | 0.4803 | 0.5014 | 0.5108 | 0.5228 | 0.5284 | 0.3201  |
| Scenario 3A     | 0.4074 | 0.4262 | 0.4621 | 0.4831 | 0.4936 | 0.5240 | 0.5322 | 0.3975  |

Table 8: Estimated treatment effect size using different standard deviations of truncated normal prior distribution for three scenarios. The true effect size is 0.5 ( $\Delta_c = 0.5$ ).

| Value of $\eta$ | 0.1    | 0.2    | 0.3    | 0.4    | 0.5    | 1      | 2      | pooling |
|-----------------|--------|--------|--------|--------|--------|--------|--------|---------|
| Scenario 1A     | 0.8732 | 0.8845 | 0.8895 | 0.8936 | 0.8891 | 0.8873 | 0.8849 | 0.8753  |
| Scenario 2A     | 0.8803 | 0.8829 | 0.8894 | 0.8916 | 0.8897 | 0.8841 | 0.8789 | 0.8828  |
| Scenario 3A     | 0.8492 | 0.8605 | 0.8672 | 0.8832 | 0.8762 | 0.8705 | 0.8694 | 0.8461  |

Table 9: Power values at 5% type I error using different standard deviations of truncated normal prior distribution for three scenarios.

583 Table 9 contains power values for the linear model of the candidate set using seven  
 584 standard deviations for the prior distributions. Considering the seven prior distributions  
 585 an impact of the prior-data conflict can be observed. From Table 8 we can see that  
 586 estimated effect size using BHM is similar to BPM if a lower standard deviation ( $\eta = 0.1$ )  
 587 is used for the prior of  $a$ . This prior distribution ( $TN(1, 0.1^2)$ ) represents a situation where  
 588 we would intuitively consider there is prior-data conflict, because under this prior, the  
 589 true value of the effect size ( $a = 0.6$ ) cannot be covered, leading to lower power values. In

590 the case of a too high standard deviation (e.g.,  $\eta = 2$ ) there is no longer a benefit through  
591 the use of BHM. This is because weakly informative prior distributions should have little  
592 influence on the posterior distribution and therefore on the Bayesian inference. As shown  
593 in Table 8, we see that values of 0.3, 0.4, 0.5 and 1 have higher power than BPM in all  
594 scenarios and the power is higher when the value of  $\eta$  is set to 0.4. As mentioned in Section  
595 2.5, the value of  $\eta$  can be estimated roughly using the empirical rule and this rule states  
596 that 68% of the distribution will occur within one standard deviation. Under scenario A,  
597 the true value of effect ratio  $a$  is equal to 0.6 and a prior distribution  $TN(1, 0.4^2)$  has 68%  
598 of its observations within one standard deviation of the mean 1 (i.e.,  $1 \pm \eta$ ), which means  
599 the probability that a variable is within a range  $[0.6, 1.4]$  in this normal distribution is  
600 68%. Since this prior distribution is symmetric the standard deviation  $\eta = 0.4$  is also an  
601 optimal choice for  $a = 1.4$ . We recommend using this approach to determine the value  
602 of standard deviation  $\eta$ .

603 In the case of no reliable information for the effect ratio, the prior distribution needs to  
604 be suitably vague so that it includes the unexpected, e.g.  $\eta = 0.5$  and  $\eta = 1$ . There exists  
605 several appropriate choices of the standard deviation. Even though the inappropriate  
606 choice of the prior distribution is selected, the power usually do not differ too much  
607 that means power values should not be strongly affected by prior-data conflicts. This  
608 is due to weakly informative truncated normal prior distributions used in our model.  
609 This truncated normal prior distribution with a truncation range  $[1/3, 3]$  provides better  
610 robustness than a normal distribution. A value of the effect ratio  $a$  exceeds this range  
611 corresponds to extremely large heterogeneity of treatment effects, and would essentially  
612 lead to no borrowing from the historical trial.

613 Therefore, heavy-tailed hyperpriors for prognostic heterogeneity and truncated normal  
614 priors for predictive heterogeneity imply a degree of robustness against prior-data conflicts  
615 which means the results are not sensitive to the prior specification. Even though the  
616 inappropriate choice of the prior distribution is selected, the power usually do not differ  
617 too much that means power values should not be strongly affected by prior-data conflicts.
